# Supplementary material for: SynapsEM: Computer-Assisted Synapse Morphometry
Source: Front Synaptic Neurosci. 2020 Dec 18;12:584549. doi: 10.3389/fnsyn.2020.584549 (PMC7775558; doi:10.3389/fnsyn.2020.584549)
Supplement: Supplementary file 6 [file Data_Sheet_4.ZIP]

Archive with 24 entries (23 files):
- hippocampus_synaptic_profiles/
- __MACOSX/._hippocampus_synaptic_profiles
- hippocampus_synaptic_profiles/060.txt
- __MACOSX/hippocampus_synaptic_profiles/._060.txt
- hippocampus_synaptic_profiles/074.txt
- __MACOSX/hippocampus_synaptic_profiles/._074.txt
- hippocampus_synaptic_profiles/072.txt
- __MACOSX/hippocampus_synaptic_profiles/._072.txt
- hippocampus_synaptic_profiles/059.txt
- __MACOSX/hippocampus_synaptic_profiles/._059.txt
- hippocampus_synaptic_profiles/071.txt
- __MACOSX/hippocampus_synaptic_profiles/._071.txt
- hippocampus_synaptic_profiles/hippocampal_example_analysis_data.mat
- __MACOSX/hippocampus_synaptic_profiles/._hippocampal_example_analysis_data.mat
- hippocampus_synaptic_profiles/055.txt
- __MACOSX/hippocampus_synaptic_profiles/._055.txt
- hippocampus_synaptic_profiles/043.txt
- __MACOSX/hippocampus_synaptic_profiles/._043.txt
- hippocampus_synaptic_profiles/090.txt
- __MACOSX/hippocampus_synaptic_profiles/._090.txt
- hippocampus_synaptic_profiles/047.txt
- __MACOSX/hippocampus_synaptic_profiles/._047.txt
- hippocampus_synaptic_profiles/078.txt
- __MACOSX/hippocampus_synaptic_profiles/._078.txt
