# Supplementary material for: SynapsEM: Computer-Assisted Synapse Morphometry
Source: Front Synaptic Neurosci. 2020 Dec 18;12:584549. doi: 10.3389/fnsyn.2020.584549 (PMC7775558; doi:10.3389/fnsyn.2020.584549)
Supplement: Supplementary file 6 [file Data_Sheet_4.ZIP › hippocampus_synaptic_profiles/043.txt]

1	docked_SV	752	391.6667	13.1867
1	docked_SV	690	389	12.6183
1	docked_SV	658.6667	392.6667	13.35
1	SV	710	418.3333	11.8369
1	SV	684.6667	433.3333	11.6428
1	SV	770.6667	437.6667	11.7426
1	SV	655	478.3333	12.5521
1	SV	689.3333	469.3333	10.8525
1	SV	712	457.3333	12.9443
1	SV	750.6667	463.6667	13.4205
1	SV	785.3333	472	17.3077
1	SV	760	497.3333	12.8236
1	SV	788.3333	526.3333	13.8644
1	SV	710.6667	525	12.4052
1	SV	740.6667	523.6667	12.4944
1	SV	717	491.6667	13.5072
1	SV	657	538	13.8283
1	SV	680	555.3333	13.1318
1	SV	704.3333	557	13.3417
1	SV	686.6667	581.6667	13.1191
1	SV	639	587.3333	13.8283
1	SV	583.3333	580.6667	14.5602
1	SV	931	565	14.8847
1	SV	958	586.3333	13.78
1	SV	984	610	13.1487
1	SV	958	616.6667	11.9257
1	SV	941	638	10.4403
1	SV	953	654	12.0784
1	SV	995	645	14.8847
1	SV	957.3333	699	14.0198
7	Plasma_membrane	1469.4933	1105,1104,1104,1103,1102,1102,1101,1101,1100,1100,1099,1099,1098,1097,1096,1096,1095,1094,1094,1094,1093,1092,1092,1091,1090,1089,1089,1088,1088,1087,1086,1086,1085,1084,1083,1082,1082,1081,1080,1079,1079,1078,1077,1076,1076,1074,1074,1073,1072,1072,1071,1070,1070,1069,1068,1068,1068,1067,1066,1065,1064,1064,1063,1062,1062,1061,1060,1059,1058,1058,1057,1056,1056,1055,1054,1054,1054,1053,1052,1052…	704,704,703,703,702,701,701,700,700,699,699,698,697,697,696,695,695,695,694,693,693,693,692,692,691,690,689,689,688,688,687,686,685,684,683,682,681,680,679,679,678,677,677,676,675,675,673,673,672,671,671,670,669,669,669,668,667,667,666,665,665,664,663,663,662,661,661,660,659,658,657,657,656,655,655,654,653,653,652,651,651,650,649,649,648,647,647,646,645,644,643,643,641,641,640,639,638,637,636,635…
7	Active_zone	273.9481	814,814,814,813,812,812,811,810,810,809,808,807,806,806,805,804,804,803,802,801,800,800,799,799,798,797,797,796,796,795,794,794,793,792,792,791,790,789,789,788,787,786,785,784,784,783,782,782,781,780,779,778,777,776,775,774,773,772,771,770,770,769,768,767,766,765,764,763,762,761,761,760,759,758,757,756,755,754,753,752,751,750,749,748,747,746,745,744,744,743,742,741,740,740,739,738,737,736,735,734…	399,398,397,397,397,396,396,396,395,395,395,395,395,394,394,394,393,393,393,393,393,392,392,391,391,391,390,390,389,389,389,388,388,388,387,387,387,387,386,386,385,385,385,385,384,384,384,383,383,383,383,383,383,383,383,382,382,382,382,382,381,381,381,381,381,381,381,381,381,381,380,380,380,380,380,380,380,379,379,379,379,379,379,379,379,379,379,379,378,378,378,378,378,377,377,377,377,377,377,377…
1	SV	723	546	10.76
