# Supplementary material for: SynapsEM: Computer-Assisted Synapse Morphometry
Source: Front Synaptic Neurosci. 2020 Dec 18;12:584549. doi: 10.3389/fnsyn.2020.584549 (PMC7775558; doi:10.3389/fnsyn.2020.584549)
Supplement: Supplementary file 6 [file Data_Sheet_4.ZIP › hippocampus_synaptic_profiles/047.txt]

7	Plasma_membrane	1835.0522	260,262,263,263,264,265,266,267,267,268,269,270,271,272,273,274,275,276,277,278,280,281,282,283,284,285,286,288,289,290,292,293,295,296,297,299,300,302,304,305,307,309,311,313,315,317,319,321,323,325,327,329,331,333,336,338,340,342,344,347,349,352,354,357,359,361,364,366,369,371,373,376,378,380,383,385,388,390,393,395,397,399,401,403,406,408,410,412,413,415,417,419,421,423,425,426,428,430,432,433…	307,307,307,308,308,308,308,308,307,307,307,307,307,307,307,307,307,307,307,307,307,307,307,307,306,306,306,306,306,306,306,306,306,306,307,307,307,307,307,307,307,307,307,307,307,306,306,306,306,306,306,306,306,306,306,306,306,306,306,306,306,306,306,307,307,307,308,308,308,308,308,308,309,309,309,309,309,309,309,309,310,310,310,310,310,310,310,310,310,311,311,311,311,311,311,312,312,312,312,312…
1	tethered_SV	842	686	14
1	docked_SV	762.5	728.5	16.5
1	SV	823.5	659.5	15.5
1	SV	752	696	15
1	tethered_SV	791	705	13
1	SV	721.5	721.5	13.5
1	tethered_SV	683	743	15
1	SV	688.5	700.5	14.5
1	SV	742	670	12
1	SV	782.5	609.5	12.5
1	SV	866.5	595.5	14.5
1	SV	869.5	563.5	12.5
1	SV	904.5	553.5	12.5
1	SV	879	537	13
1	SV	847.5	548.5	14.5
1	SV	871	506	15
1	SV	805.5	462.5	13.5
1	SV	776.5	465.5	14.5
1	SV	744.5	436.5	14.5
1	SV	763.5	507.5	15.5
1	SV	785	529	14
1	SV	818	540	13
1	SV	764	577	13
1	SV	731	565	13
1	SV	720.5	535.5	14.5
1	SV	730.5	501.5	13.5
1	SV	681	505	15
1	SV	698.5	454.5	12.5
1	SV	709	479	13
1	SV	653	489	13
1	SV	628.5	471.5	12.5
1	SV	636	436	12
1	SV	592	441	15
1	SV	595	482	14
1	SV	555.5	526.5	12.5
1	SV	588.5	537.5	12.5
1	SV	621	528	13
1	SV	619	565	13
1	SV	644.5	543.5	10.5
1	SV	677.5	557.5	12.5
1	SV	685	532	13
1	SV	693	601	14
1	SV	661.5	613.5	12.5
1	SV	627.5	624.5	13.5
1	SV	628.5	652.5	13.5
1	SV	654	669	13
1	SV	683.5	658.5	13.5
1	SV	712.5	647.5	12.5
1	SV	630.5	687.5	14.5
1	SV	604	736	12
1	SV	632.5	715.5	11.5
1	SV	660.5	711.5	13.5
1	SV	593.5	687.5	13.5
1	SV	570.5	702.5	11.5
1	SV	556	673	11
1	SV	587.5	660.5	13.5
1	SV	593	633	14
1	SV	575.5	604.5	12.5
1	SV	564.5	576.5	12.5
1	SV	589.5	564.5	12.5
1	SV	555.5	555.5	12.5
1	SV	541	604	13
1	SV	504	605	11
1	SV	527	583	14
1	SV	481	635	14
1	SV	530.5	641.5	13.5
1	SV	504	695	13
1	SV	469.5	690.5	15.5
1	tethered_SV	485	721	11
1	SV	543.5	707.5	13.5
1	SV	417.5	678.5	12.5
1	SV	448.5	660.5	11.5
1	SV	419.5	650.5	12.5
1	SV	447.5	629.5	13.5
1	SV	428	611	13
1	SV	438.5	554.5	13.5
1	SV	504	556	12
1	SV	520.5	535.5	13.5
1	SV	513.5	508.5	11.5
1	SV	552.5	472.5	12.5
1	SV	539	444	12
1	SV	508	442	12
1	SV	486.5	418.5	14.5
1	SV	459	399	13
1	SV	495	371	12
1	SV	491.5	344.5	13.5
1	SV	453	343	12
1	SV	420	362	12
1	SV	286.5	333.5	11.5
1	SV	251	333	12
1	SV	264	386	12
1	SV	257	426	13
1	SV	297.5	430.5	13.5
1	SV	296	391	10
1	SV	320	410	12
1	SV	340	397	11
1	SV	366.5	372.5	12.5
1	SV	343.5	448.5	12.5
1	SV	386.5	447.5	13.5
1	SV	446	430	13
1	SV	399	424	12
1	SV	393.5	394.5	12.5
1	SV	452	455	12
1	SV	435.5	486.5	12.5
1	SV	383.5	484.5	11.5
1	SV	361.5	517.5	11.5
1	SV	332	533	12
1	SV	298.5	517.5	9.5
1	SV	267.5	518.5	13.5
1	SV	279.5	544.5	12.5
1	SV	267	580	13
1	SV	300	597	13
1	SV	312	566	13
1	SV	331.5	606.5	13.5
1	SV	355	628	13
1	tethered_SV	364	669	12
1	SV	388.5	645.5	11.5
1	SV	378	594	13
1	SV	409	584	13
1	SV	370.5	547.5	11.5
1	SV	400.5	525.5	12.5
1	SV	432	521	13
1	SV	477	524	14
1	SV	500	493	13
1	SV	487	466	11
1	SV	468	594	12
1	SV	495	580	11
1	SV	511.5	666.5	11.5
7	Active_zone	173.9563	921,920,919,918,917,917,916,915,914,913,912,911,910,909,908,907,905,904,902,901,899,897,896,895,893,892,891,888,887,885,883,882,881,879,878,877,875,874,873,871,871,869,869,867,867,865,865,864,862,861,859,858,857,855,855,853,852,851,849,848,847,845,843,842,841,839,838,837,835,834,833,831,830,829,827,826,825,824,823,821,821,819,818,817,816,815,814,813,811,810,809,808,807,806,805,803,802,801,799,798…	464,464,463,463,463,462,462,461,461,460,460,459,459,459,459,458,458,457,456,455,455,454,453,453,452,451,451,449,448,447,447,446,445,445,443,443,442,441,441,440,439,439,438,438,437,437,436,436,435,435,434,433,433,432,431,431,431,430,429,429,427,427,426,425,425,424,423,423,422,421,421,421,420,420,419,419,419,419,418,418,417,417,417,416,416,415,415,415,414,414,413,413,412,412,411,411,410,410,409,409…
1	docked_SV	813	426	11.949
1	docked_SV	785.6667	415	11.0353
1	SV	754	636.3333	15.3659
1	SV	645.3333	740.6667	11.7426
7	Active_zone	304.5625	648,648,649,650,650,651,652,653,654,655,656,657,658,659,660,661,662,662,663,664,665,666,667,668,669,670,671,672,673,674,675,676,677,678,679,680,681,682,683,684,686,687,689,690,691,692,693,694,696,697,698,698,700,701,702,703,704,706,708,709,710,712,713,715,716,718,719,720,722,724,726,727,728,729,730,731,733,734,735,736,737,738,740,740,742,743,744,745,746,746,748,749,750,751,752,753,754,755,756,757…	779,778,778,778,777,777,777,777,776,776,776,775,775,775,775,774,774,773,773,773,773,773,772,772,772,771,771,771,771,771,771,770,770,770,770,769,769,769,769,769,768,768,767,767,766,766,765,765,764,764,764,763,763,763,763,763,762,761,761,761,761,760,759,759,759,758,757,757,756,755,755,755,754,753,753,752,751,751,751,751,750,750,750,749,749,749,749,748,748,747,747,747,747,747,746,745,745,745,744,744…
1	SV	360	469	10.6354
1	SV	427.6667	408	11.1754
1	SV	358.6667	425.6667	11.8228
1	SV	317.3333	347.3333	12.5477
1	SV	859.3333	638.6667	12.1655
1	SV	231	386	11.4115
