# Supplementary material for: SynapsEM: Computer-Assisted Synapse Morphometry
Source: Front Synaptic Neurosci. 2020 Dec 18;12:584549. doi: 10.3389/fnsyn.2020.584549 (PMC7775558; doi:10.3389/fnsyn.2020.584549)
Supplement: Supplementary file 6 [file Data_Sheet_4.ZIP › hippocampus_synaptic_profiles/055.txt]

7	Plasma_membrane	1402.675	417,417,418,418,419,420,421,421,422,423,424,425,426,427,429,430,431,432,434,435,437,438,440,442,444,446,447,449,451,453,455,457,458,460,462,463,465,466,468,470,472,474,475,477,479,481,483,485,487,489,490,492,493,495,496,498,499,500,501,503,504,505,506,508,509,510,511,512,513,515,516,517,518,519,521,522,523,524,525,526,527,528,529,530,531,532,533,534,535,536,537,538,539,540,541,542,543,544,546,547…	41,43,44,45,45,46,46,47,47,48,49,49,50,51,52,53,55,56,57,58,59,61,62,64,65,67,68,70,71,72,74,75,76,77,79,80,82,84,85,87,89,91,93,95,96,98,99,101,103,104,106,107,109,110,111,112,114,115,116,117,118,119,120,121,122,123,123,124,125,127,128,129,130,131,132,134,135,137,138,140,141,143,144,146,148,150,151,153,155,156,158,160,162,163,165,167,169,171,173,175,177,179,181,183,186,188,190,192,194,196,198,20…
7	Active_zone	190.2673	722,723,723,723,723,724,724,724,724,724,724,724,723,723,723,723,723,724,724,724,724,724,724,724,724,724,724,724,724,724,724,724,724,724,724,724,724,724,723,723,723,723,723,723,723,723,723,723,722,722,722,722,722,721,721,721,721,720,720,720,720,720,720,720,720,720,720,720,720,720,720,719,719,719,719,719,719,718,718,718,718,717,717,717,717,716,716,716,715,715,714,714,714,713,713,713,712,712,712,712…	471,472,473,474,475,477,478,479,480,481,482,484,485,487,489,490,492,494,495,497,498,499,500,502,503,505,506,508,510,512,514,516,517,519,520,522,523,525,526,528,529,530,531,532,533,534,536,537,538,539,540,542,543,545,546,548,549,550,552,553,554,555,556,557,558,559,560,561,562,563,565,566,567,569,570,571,572,573,574,575,576,577,579,580,581,582,583,585,586,588,589,591,592,593,594,596,597,598,600,601…
1	docked_SV	711	508	12
1	tethered_SV	697.5	570.5	13.5
1	tethered_SV	664.5	645.5	11.5
1	SV	626	677	13
1	SV	626.5	643.5	11.5
1	SV	631	615	13
1	SV	588	606	14
1	SV	557	620	12
1	SV	530	631	15
1	SV	536	667	15
1	SV	561.5	588.5	12.5
1	SV	529.5	575.5	13.5
1	SV	533	538	13
1	SV	562	557	14
1	SV	566	531	13
1	SV	579.5	502.5	12.5
1	SV	617.5	498.5	12.5
1	SV	603	551	14
1	SV	681.5	474.5	9.5
1	SV	645.5	456.5	10.5
1	SV	652	492	12
1	SV	647.5	570.5	13.5
1	SV	681	533	13
1	SV	610.5	419.5	12.5
1	SV	638.5	401.5	11.5
1	SV	612.5	382.5	10.5
1	SV	636.5	357.5	12.5
1	SV	547.5	352.5	10.5
1	SV	567.5	331.5	13.5
1	SV	534.5	286.5	11.5
1	SV	528.5	255.5	12.5
1	SV	530	225	12
1	SV	474.5	218.5	12.5
1	SV	433.5	170.5	12.5
1	SV	401	151	13
1	SV	435	133	13
1	SV	431.5	101.5	10.5
1	SV	398	114	13
1	SV	360.5	102.5	11.5
1	SV	340	70	12
1	SV	479.5	326.5	12.5
1	SV	468.5	287.5	12.5
1	SV	486.5	257.5	12.5
1	SV	458	242	13
1	SV	499	237	12
1	SV	512.5	329.5	14.5
1	SV	520	364	14
1	SV	530.5	396.5	11.5
1	SV	495	404	13
1	SV	514.5	428.5	12.5
1	SV	486.5	458.5	13.5
1	SV	474	424	13
1	SV	564	413	12
1	SV	529	458	14
1	SV	540.5	510.5	12.5
1	SV	598.5	478.5	13.5
1	SV	609.5	450.5	12.5
1	SV	671.5	429.5	14.5
1	SV	610	574	11
1	SV	583	441.6667	11.8977
1	SV	608.3333	646.6667	11.3529
