# Supplementary material for: SynapsEM: Computer-Assisted Synapse Morphometry
Source: Front Synaptic Neurosci. 2020 Dec 18;12:584549. doi: 10.3389/fnsyn.2020.584549 (PMC7775558; doi:10.3389/fnsyn.2020.584549)
Supplement: Supplementary file 6 [file Data_Sheet_4.ZIP › hippocampus_synaptic_profiles/059.txt]

1	tethered_SV	630.5	513.5	16.5
1	tethered_SV	625	585	15
1	docked_SV	616.5	625.5	15.5
1	SV	642	666	16
1	SV	671	605	14
1	SV	664	567	14
1	SV	696.5	584.5	13.5
1	SV	716.5	554.5	16.5
1	SV	739.5	583.5	14.5
1	SV	695	619	15
1	SV	675.5	662.5	14.5
1	SV	702.5	652.5	14.5
1	SV	725	635	15
1	SV	693	696	15
1	SV	672	727	13
1	SV	709	732	14
1	SV	727.5	772.5	13.5
1	SV	786.5	799.5	11.5
1	SV	760.5	621.5	14.5
1	SV	776.5	547.5	14.5
1	SV	820.5	539.5	14.5
1	SV	804	501	15
1	SV	765.5	504.5	13.5
1	SV	784.5	477.5	12.5
1	SV	801	445	14
1	SV	797	415	14
1	SV	826.5	393.5	14.5
1	SV	757	409	14
1	SV	723	390	14
1	SV	705.5	292.5	17.5
1	SV	723	428	17
1	SV	756	439	13
1	SV	744	472	15
1	SV	872	573	13
1	DCV	869	507	23
1	SV	854	548	12
3	Endosome	3824	793,791,791,790,790,790,789,789,788,788,787,787,786,786,785,785,784,784,783,783,782,781,780,780,779,778,777,777,776,775,774,773,772,771,770,769,768,767,766,765,765,764,763,762,761,760,759,758,757,757,756,755,754,753,752,752,751,750,749,748,747,747,746,745,745,744,744,744,743,742,742,742,741,741,741,740,740,740,740,739,739,739,739,739,738,738,738,738,738,738,738,738,738,738,738,738,738,738,738,738…	320,318,317,317,316,315,315,314,314,313,313,312,311,310,310,309,309,308,308,307,307,306,306,305,305,305,305,304,304,304,304,304,304,304,304,304,304,304,304,304,305,305,305,305,305,306,306,306,306,307,307,308,308,309,309,310,311,312,313,314,315,316,317,318,319,319,320,321,323,324,325,326,327,328,329,330,331,332,333,334,335,336,337,338,339,340,341,343,344,345,346,347,348,349,350,351,352,353,354,355…
7	Plasma_membrane	1621.0761	924,924,923,923,923,923,923,922,922,922,922,922,922,922,921,921,921,921,921,920,920,920,919,919,919,919,919,919,919,919,919,919,919,919,919,918,918,918,918,918,917,917,917,917,917,917,917,917,916,916,916,916,916,916,916,915,915,915,915,915,915,915,915,914,914,914,914,913,913,913,913,912,912,912,911,911,910,910,910,910,909,909,908,908,908,907,907,907,906,906,906,905,905,905,905,904,904,904,904,903…	546,545,545,544,543,542,541,540,539,538,537,536,535,534,532,531,529,528,527,526,525,524,523,522,521,519,517,516,515,512,510,509,507,504,503,502,501,500,499,498,497,496,495,494,493,492,491,490,489,487,486,485,484,483,482,482,481,480,479,478,477,476,475,474,473,472,471,471,470,469,468,467,466,465,464,463,462,461,460,459,458,457,456,455,454,454,452,451,450,449,448,447,446,445,444,443,442,441,440,439…
7	Active_zone	193.7628	610,610,609,609,609,609,609,608,608,608,608,608,608,607,607,607,607,607,607,607,607,607,607,607,606,606,606,606,606,606,606,606,606,606,606,606,607,607,607,607,607,607,607,607,607,607,607,607,607,607,606,606,606,606,606,606,606,606,606,607,607,607,607,607,607,607,607,607,607,607,607,607,607,607,607,607,607,607,607,607,607,607,607,607,607,606,606,606,606,606,606,606,606,606,606,606,606,606,606,606…	499,498,501,502,503,504,505,506,507,508,509,510,511,511,512,513,514,515,516,517,518,519,520,521,521,522,523,524,525,526,527,528,529,530,531,532,533,534,535,536,537,538,539,540,541,542,543,544,545,546,546,547,548,549,550,551,552,553,554,554,555,556,557,558,559,560,561,562,563,564,565,566,567,568,569,570,571,572,573,574,575,576,577,578,579,579,580,581,582,583,584,585,586,587,588,589,590,591,592,593…
