# Supplementary material for: SynapsEM: Computer-Assisted Synapse Morphometry
Source: Front Synaptic Neurosci. 2020 Dec 18;12:584549. doi: 10.3389/fnsyn.2020.584549 (PMC7775558; doi:10.3389/fnsyn.2020.584549)
Supplement: Supplementary file 6 [file Data_Sheet_4.ZIP › hippocampus_synaptic_profiles/060.txt]

1	SV	637	653	14
1	SV	598.5	639.5	16.5
1	SV	671	662	14
1	SV	710	665	14
1	SV	741.5	681.5	12.5
1	SV	772.5	698.5	13.5
1	SV	812	698	14
1	SV	823	736	14
1	SV	769.5	740.5	13.5
1	SV	720.5	713.5	13.5
1	SV	685.5	698.5	12.5
1	SV	673.5	625.5	14.5
1	SV	675	589	14
1	SV	698.5	524.5	14.5
1	SV	746.5	529.5	14.5
1	SV	788	535	14
1	SV	786	572	14
1	SV	765.5	598.5	14.5
1	SV	741.5	616.5	13.5
1	SV	726	582	13
1	SV	706.5	619.5	13.5
1	SV	744	656	13
1	SV	770	659	14
1	SV	799	612	15
1	SV	834	599	14
1	SV	852	628	14
1	SV	914	621	13
1	SV	856.5	585.5	13.5
1	SV	818.5	565.5	13.5
1	SV	791	497	15
1	SV	788.5	388.5	14.5
1	SV	754	362	15
1	SV	658	397	15
1	SV	619	469	16
1	SV	642	530	16
1	SV	721.5	497.5	15.5
1	SV	666	555	15
1	DCV	875	674	19
7	Plasma_membrane	1568.6904	953,953,952,952,953,953,954,955,957,957,957,959,959,961,961,962,963,964,965,966,966,967,967,968,968,969,969,970,971,971,972,973,973,974,975,976,976,977,978,979,979,981,981,982,983,983,984,984,985,985,986,986,987,987,987,988,989,989,989,989,990,990,991,991,991,991,992,993,993,993,994,994,995,995,995,995,996,997,997,997,997,998,998,998,999,999,999,999,999,999,999,1000,1000,1000,1000,1001,1001,1001,…	418,417,417,416,417,418,418,419,421,422,424,425,427,428,429,429,431,431,433,434,435,436,437,437,438,439,440,441,441,443,444,445,446,447,449,450,451,453,455,456,457,459,461,463,463,465,466,467,468,469,470,471,472,473,474,475,476,477,478,479,480,481,482,483,484,485,487,488,489,491,493,494,496,498,500,501,503,505,507,508,511,513,515,516,518,520,521,523,525,527,529,529,531,532,533,535,536,537,539,540…
7	Active_zone	385.1033	867,867,866,865,864,863,862,861,860,859,858,857,856,855,854,853,852,851,850,849,848,847,846,845,844,843,843,842,841,840,839,838,837,836,835,834,834,833,832,831,831,830,829,828,827,826,825,824,823,822,821,820,819,818,817,816,815,814,813,812,811,810,809,807,806,805,804,803,802,801,800,799,797,796,795,794,793,792,791,790,789,789,788,787,786,785,785,784,783,782,781,780,779,779,778,777,777,776,775,774…	817,818,818,818,818,818,818,818,818,818,818,818,818,818,818,817,817,817,817,817,817,817,817,817,817,817,816,816,816,816,816,816,816,816,816,816,815,815,815,815,814,814,814,814,814,814,813,813,812,812,812,812,811,811,810,810,810,810,809,809,809,808,808,808,808,807,806,806,806,806,806,806,805,804,804,804,804,804,804,804,804,803,803,803,803,803,802,802,802,802,802,802,802,801,801,801,800,800,800,800…
1	docked_SV	646.9815	715.9815	14.9815
1	SV	810	649.3333	15.9339
1	SV	709.6667	549.3333	14.6363
1	tethered_SV	618.5	693.5	14.5
1	tethered_SV	740.3333	765.6667	15.3551
1	SV	817.6667	776	12.8798
