# Supplementary material for: SynapsEM: Computer-Assisted Synapse Morphometry
Source: Front Synaptic Neurosci. 2020 Dec 18;12:584549. doi: 10.3389/fnsyn.2020.584549 (PMC7775558; doi:10.3389/fnsyn.2020.584549)
Supplement: Supplementary file 6 [file Data_Sheet_4.ZIP › hippocampus_synaptic_profiles/071.txt]

1	docked_SV	717	656	16
1	SV	570.5	628.5	12.5
1	docked_SV	388.5	679.5	14.5
1	SV	377	645	14
1	SV	386.5	613.5	12.5
1	SV	336	641	13
1	SV	343.5	618.5	13.5
1	SV	309	601	15
1	SV	419.5	571.5	13.5
1	SV	422.5	536.5	13.5
1	SV	454	546	14
1	SV	475.5	510.5	12.5
1	SV	411.5	489.5	11.5
1	SV	419.5	452.5	14.5
1	SV	347	461	13
1	SV	382	443	14
1	SV	326.5	434.5	16.5
1	SV	411	198	14
1	SV	517	561	15
1	SV	557	570	14
1	SV	604	567	14
1	SV	680	563	15
1	SV	657	505	14
1	SV	698	501	14
1	SV	726.5	477.5	13.5
1	SV	758.5	487.5	13.5
1	SV	766.5	525.5	14.5
1	SV	832.5	531.5	13.5
1	SV	808	515	14
1	SV	831	499	15
1	SV	805.5	554.5	14.5
1	SV	766	558	14
1	SV	721.5	546.5	15.5
1	SV	843	584	13
1	SV	886.5	597.5	14.5
1	SV	863	559	13
1	SV	749	625	13
1	SV	723.5	585.5	13.5
1	SV	945.5	544.5	13.5
1	SV	897	514	12
1	SV	963.5	491.5	17.5
1	SV	1028.5	526.5	15.5
1	SV	1082	552	13
1	LV	340	558	20
1	LV	261.5	598.5	21.5
1	LV	268	555	18
1	SV	227.3333	631.3333	12.6842
3	Endosome	10784	956,956,956,957,957,956,956,954,953,953,952,950,950,949,948,946,945,942,941,940,938,937,937,936,936,934,933,932,930,929,928,926,925,922,921,920,918,917,916,913,910,909,908,906,905,902,901,900,898,897,896,894,893,892,890,889,886,885,884,882,881,880,877,876,874,873,872,870,869,868,866,865,864,862,862,861,860,858,857,856,856,854,852,850,849,848,846,845,844,842,841,840,838,838,837,836,834,834,833,832…	450,453,454,454,456,457,458,461,464,465,466,469,470,472,473,473,474,477,478,480,481,481,482,482,484,484,484,485,486,486,486,488,488,489,489,489,490,490,490,492,492,492,493,493,493,493,493,493,493,493,493,493,493,493,493,492,490,490,489,489,489,488,488,488,486,486,486,485,485,484,484,484,484,484,482,482,482,482,481,481,480,480,480,480,478,478,477,477,476,476,474,474,473,472,472,470,469,468,466,465…
1	SV	772	434.6667	16.7066
3	Endosome	7572	700,700,698,698,698,697,696,694,693,692,690,689,689,688,686,685,685,684,682,682,681,680,680,678,677,676,674,673,673,672,670,669,668,666,666,665,664,662,662,661,660,658,657,656,654,653,652,650,649,648,646,645,644,642,641,640,638,637,636,634,633,632,630,629,628,626,625,624,622,621,620,618,617,616,614,613,612,610,609,608,608,606,605,604,602,602,601,600,600,598,597,597,596,594,594,593,592,592,590,589…	152,153,154,156,157,158,160,162,164,165,165,166,168,169,169,169,170,170,172,173,173,174,176,176,177,177,178,178,180,180,181,181,182,182,184,184,184,184,185,185,185,186,186,186,186,186,186,186,188,188,188,188,188,188,188,188,188,188,188,188,188,188,188,188,188,188,188,188,188,188,188,188,188,186,186,185,185,185,184,184,182,182,182,181,181,180,180,180,178,178,178,177,177,176,174,174,174,173,172,170…
3	Endosome	5725	253,252,252,252,252,252,250,250,250,250,249,249,248,246,245,245,244,244,242,241,241,241,240,240,238,237,236,234,233,233,232,230,230,229,228,226,225,224,222,221,220,218,217,216,214,213,212,210,209,208,206,205,204,202,200,198,197,196,193,192,190,188,186,185,184,182,181,178,177,176,173,172,170,168,166,165,164,162,161,161,160,158,157,156,154,153,152,150,149,149,148,148,146,145,145,144,144,144,142,142…	493,494,496,497,498,500,501,502,504,505,506,508,509,512,513,514,516,517,517,518,520,521,521,522,522,524,525,526,526,528,529,529,530,530,530,530,532,532,532,532,532,532,532,532,532,532,533,533,533,533,534,534,534,534,534,536,536,536,536,536,536,536,536,536,536,536,536,536,534,534,534,534,533,533,533,533,532,532,532,530,530,530,530,530,530,529,529,528,528,526,526,525,524,522,521,521,518,517,516,514…
1	SV	771.3333	604.6667	11.8134
7	Plasma_membrane	1426.7798	1346,1345,1344,1342,1341,1340,1338,1337,1337,1336,1334,1334,1333,1330,1329,1328,1326,1325,1325,1322,1321,1320,1318,1317,1316,1314,1313,1312,1309,1308,1306,1304,1302,1301,1300,1298,1297,1296,1294,1293,1292,1290,1289,1289,1288,1288,1286,1285,1284,1284,1282,1281,1280,1278,1277,1277,1276,1274,1273,1273,1272,1270,1269,1268,1268,1266,1265,1264,1262,1261,1260,1258,1257,1257,1256,1254,1253,1252,1250,1250…	452,452,452,452,452,452,452,452,453,453,453,454,454,456,456,457,458,460,461,462,462,464,465,466,468,469,469,470,472,473,473,474,476,477,478,478,480,481,482,484,485,486,488,489,489,490,492,493,494,496,497,498,500,501,501,502,504,504,505,506,508,508,509,509,510,510,512,513,513,514,516,517,517,518,520,521,522,524,525,526,528,529,530,530,532,533,533,534,534,536,536,537,537,538,538,540,540,541,541,542…
7	Active_zone	858.4918	210,210,210,210,212,212,213,214,214,216,217,218,220,221,222,224,225,226,228,229,230,233,234,236,237,238,240,241,244,246,248,249,250,252,252,253,254,256,257,258,260,261,262,264,265,266,268,269,270,272,273,274,276,280,281,284,285,286,289,290,292,294,296,297,298,301,302,305,306,309,310,312,314,317,318,321,322,324,326,328,329,332,334,336,338,340,342,345,346,349,350,352,353,354,356,357,358,360,361,362…	686,688,689,690,690,692,692,692,693,693,693,693,693,693,694,694,694,694,694,694,694,694,694,694,694,694,694,694,694,694,694,694,694,694,693,693,693,693,693,693,693,693,693,693,693,693,693,693,693,693,693,693,693,693,693,693,693,693,693,692,692,692,692,692,692,692,692,692,692,692,692,692,690,690,690,690,690,690,690,690,690,690,690,690,690,690,690,690,690,690,692,692,692,692,692,692,692,692,692,692…
1	docked_SV	665.6667	667.3333	13.4371
1	SV	675.3333	631	13.1867
1	SV	832.3333	616.3333	13.8644
1	SV	793	380.3333	14.3372
1	SV	437.6667	509	12.1335
1	SV	267.3333	473	12.8668
1	SV	506	213	14.8661
