# Supplementary material for: SynapsEM: Computer-Assisted Synapse Morphometry
Source: Front Synaptic Neurosci. 2020 Dec 18;12:584549. doi: 10.3389/fnsyn.2020.584549 (PMC7775558; doi:10.3389/fnsyn.2020.584549)
Supplement: Supplementary file 6 [file Data_Sheet_4.ZIP › hippocampus_synaptic_profiles/072.txt]

7	Plasma_membrane	1606.7714	1232,1230,1232,1233,1234,1235,1236,1238,1239,1241,1243,1245,1246,1248,1250,1252,1254,1256,1258,1260,1262,1264,1266,1267,1269,1271,1272,1274,1275,1277,1278,1279,1281,1282,1283,1284,1286,1287,1288,1289,1290,1292,1293,1294,1295,1296,1298,1299,1300,1301,1302,1304,1305,1306,1307,1308,1310,1311,1312,1313,1314,1315,1317,1318,1319,1320,1321,1322,1323,1324,1325,1326,1327,1328,1329,1330,1331,1332,1333,1333…	407,407,407,408,408,409,410,411,412,414,415,417,419,421,424,426,428,430,431,433,435,436,438,440,442,443,445,447,449,450,452,454,455,457,458,460,461,462,464,465,467,468,469,471,472,473,475,476,478,479,481,483,484,486,487,489,491,493,495,497,499,501,503,504,506,508,510,512,513,515,517,519,521,523,525,527,528,530,532,534,536,537,539,541,542,544,545,547,548,550,551,553,555,556,558,559,561,563,564,566…
7	Active_zone	616.0051	1099,1098,1097,1097,1096,1095,1095,1094,1093,1093,1092,1091,1090,1089,1088,1087,1087,1086,1085,1084,1083,1082,1082,1081,1080,1079,1079,1078,1077,1076,1075,1074,1073,1072,1071,1070,1069,1068,1067,1066,1065,1064,1063,1062,1061,1060,1059,1058,1057,1056,1055,1054,1053,1052,1051,1050,1049,1048,1047,1046,1045,1044,1044,1043,1042,1041,1040,1039,1038,1037,1036,1035,1034,1033,1032,1031,1030,1029,1028,1027…	743,743,742,741,741,741,740,740,740,739,739,739,739,739,739,739,738,738,738,737,737,737,736,736,736,736,735,735,735,735,735,734,734,734,733,733,733,733,732,732,732,732,732,732,732,732,731,731,731,731,730,730,730,730,730,729,729,729,729,728,728,728,727,727,727,727,726,726,726,726,725,725,725,724,724,724,723,723,723,723,722,722,722,721,721,721,720,720,720,719,719,719,719,718,718,718,718,717,717,717…
1	tethered_SV	601.5	635.5	12.5
1	SV	582	605	16
1	SV	627	614	13
1	SV	683.5	587.5	15.5
1	SV	777.5	616.5	13.5
1	SV	776	577	14
1	SV	723	579	14
1	SV	820	599	14
1	SV	837	565	13
1	SV	857.5	544.5	13.5
1	SV	895	531	14
1	SV	884	499	14
1	SV	913	494	14
1	SV	954	496	14
1	SV	993.5	499.5	10.5
1	SV	989.5	536.5	11.5
1	SV	1023	511	13
1	SV	1058	527	14
1	SV	1091.5	569.5	14.5
1	SV	1102.5	606.5	14.5
1	SV	1125	654	14
1	SV	1139.5	622.5	13.5
1	SV	1161.5	624.5	13.5
1	SV	1172	653	14
1	SV	1169.5	680.5	16.5
1	SV	1133.5	683.5	13.5
1	tethered_SV	1122	724	12
1	SV	1181.5	712.5	13.5
1	SV	1233	661	11
1	SV	1204	690	15
1	SV	1092.5	675.5	15.5
1	SV	1050.5	667.5	13.5
1	SV	1071.5	637.5	14.5
1	SV	1032	636	14
1	SV	990	618	13
1	SV	1008.5	596.5	13.5
1	SV	1016.5	561.5	13.5
1	SV	979.5	570.5	12.5
1	SV	947	591	12
1	SV	883.5	600.5	14.5
1	SV	883	565	15
1	SV	932	537	16
1	tethered_SV	903	654	14
1	SV	961	627	13
1	SV	882	633	14
1	tethered_SV	655.5	634.5	12.5
1	SV	611.5	573.5	13.5
1	SV	476.5	479.5	13.5
1	SV	421	499	14
1	SV	411.5	611.5	12.5
1	SV	431.5	584.5	12.5
1	SV	454.5	563.5	13.5
1	SV	431	540	14
1	SV	450	628	15
1	SV	466	602	15
1	SV	519	625	13
1	SV	543	594	13
1	SV	571	543	13
1	SV	511.5	572.5	14.5
1	SV	286	619	15
1	SV	205.5	660.5	16.5
1	docked_SV	712.6818	648.6818	14.6818
1	docked_SV	962.6667	690	15.0739
1	SV	1032.3333	702.6667	16.66
1	SV	853.6667	662	13.3417
1	SV	565.6667	638.3333	11.7237
1	SV	576.3333	572.6667	12.3693
1	SV	550	519	13.4205
1	SV	1206	651.6667	13.6829
1	SV	1153.6667	722	14.004
