# Supplementary material for: SynapsEM: Computer-Assisted Synapse Morphometry
Source: Front Synaptic Neurosci. 2020 Dec 18;12:584549. doi: 10.3389/fnsyn.2020.584549 (PMC7775558; doi:10.3389/fnsyn.2020.584549)
Supplement: Supplementary file 6 [file Data_Sheet_4.ZIP › hippocampus_synaptic_profiles/074.txt]

7	Plasma_membrane	2109.8152	1280,1279,1278,1277,1276,1275,1274,1273,1272,1271,1269,1268,1266,1265,1263,1261,1259,1257,1255,1253,1251,1248,1246,1243,1241,1238,1236,1233,1231,1228,1225,1223,1220,1218,1216,1214,1211,1209,1207,1205,1203,1200,1198,1196,1195,1193,1191,1189,1187,1185,1183,1181,1179,1177,1175,1172,1170,1167,1164,1162,1159,1157,1154,1151,1149,1145,1142,1139,1135,1132,1128,1125,1121,1118,1115,1112,1108,1105,1102,1099…	640,640,640,640,641,641,641,641,641,641,641,641,641,641,641,641,641,640,640,640,640,640,639,639,639,639,639,638,638,638,638,638,638,638,638,638,637,637,637,637,637,637,637,636,636,636,636,636,635,635,634,634,633,633,632,631,631,630,629,629,628,627,627,626,625,624,624,623,622,621,621,620,620,619,619,618,618,618,618,618,618,618,618,618,618,619,619,619,620,620,620,621,621,621,622,622,622,623,624,624…
1	docked_SV	648.5	712.5	14.5
1	docked_SV	585	694	17
1	tethered_SV	520.5	657.5	14.5
1	tethered_SV	475.5	647.5	14.5
1	docked_SV	357.5	623.5	15.5
1	tethered_SV	258	575	13
1	tethered_SV	227	562	13
1	tethered_SV	196	550	14
1	SV	236	540	14
1	SV	318.5	504.5	12.5
1	SV	288	512	14
1	SV	298	555	14
1	SV	354.5	505.5	13.5
1	SV	245	513	13
1	SV	388.5	551.5	12.5
1	tethered_SV	328.5	608.5	11.5
1	SV	326	581	13
1	SV	363	573	16
1	SV	418	594	14
1	SV	450.5	577.5	14.5
1	SV	484.5	592.5	13.5
1	SV	459.5	527.5	12.5
1	SV	425.5	512.5	14.5
1	SV	464.5	477.5	15.5
1	SV	514	468	14
1	SV	557.5	469.5	12.5
1	SV	488	514	13
1	SV	545.5	503.5	13.5
1	SV	576.5	507.5	12.5
1	SV	552	532	14
1	SV	514	625	12
1	SV	539	610	14
1	SV	574.5	614.5	13.5
1	SV	606	568	14
1	SV	587.5	541.5	14.5
1	SV	604.5	520.5	12.5
1	SV	619	493	12
1	SV	643.5	519.5	14.5
1	SV	682.5	499.5	13.5
1	SV	680.5	464.5	14.5
1	SV	647	550	13
1	SV	711	548	13
1	SV	716	516	11
1	SV	736.5	497.5	13.5
1	SV	774	507	14
1	SV	821	495	13
1	SV	821	527	16
1	SV	833	558	15
1	SV	869.5	540.5	12.5
1	SV	867	510	13
1	SV	900.5	584.5	12.5
1	SV	897	555	13
1	SV	902	653	15
1	SV	947	635	16
1	SV	874.5	677.5	12.5
1	SV	897	620	14
1	SV	857	651	12
1	SV	846.5	698.5	13.5
1	SV	857	613	12
1	SV	855.5	579.5	12.5
1	SV	817	587	13
1	SV	835	602	12
1	SV	804.5	623.5	13.5
1	SV	774.5	645.5	12.5
1	SV	770.5	610.5	13.5
1	SV	753.5	564.5	13.5
1	SV	729	587	12
1	SV	700	606	14
1	SV	658.5	617.5	12.5
1	SV	638	650	11
1	SV	623.5	616.5	11.5
1	SV	629.5	588.5	13.5
1	SV	664	582	14
1	SV	737.5	636.5	13.5
1	SV	432.0384	637.0384	13.0384
7	Active_zone	536.5771	711,710,710,709,709,708,708,707,706,705,705,704,703,703,702,701,700,700,699,698,698,697,696,696,695,694,693,692,691,690,690,689,688,687,686,685,684,684,683,682,681,680,679,678,677,676,675,674,673,672,671,670,670,669,668,668,667,666,666,665,664,663,663,662,661,660,660,659,658,658,657,656,656,655,654,653,652,651,650,649,648,647,646,645,644,643,642,641,640,640,639,638,638,637,636,636,635,634,634,633…	752,752,751,751,750,750,749,749,748,748,747,747,747,746,746,745,745,744,744,744,743,743,743,742,742,742,741,741,741,741,740,740,740,740,740,740,740,739,739,739,739,739,739,739,739,739,739,739,738,738,738,738,737,737,737,736,736,736,735,735,735,735,734,734,734,734,733,733,733,732,732,732,731,731,731,731,731,730,730,730,730,730,729,729,729,729,728,728,728,727,727,727,726,726,726,725,725,725,724,724…
