# Supplementary material for: SynapsEM: Computer-Assisted Synapse Morphometry
Source: Front Synaptic Neurosci. 2020 Dec 18;12:584549. doi: 10.3389/fnsyn.2020.584549 (PMC7775558; doi:10.3389/fnsyn.2020.584549)
Supplement: Supplementary file 6 [file Data_Sheet_4.ZIP › hippocampus_synaptic_profiles/078.txt]

1	SV	809.5	463.5	16.5
1	tethered_SV	492.5	385.5	13.5
1	docked_SV	466	405	13
1	tethered_SV	530.5	347.5	12.5
1	docked_SV	583.5	322.5	13.5
1	tethered_SV	554.5	336.5	12.5
1	SV	615.5	333.5	14.5
1	SV	549.5	367.5	14.5
1	SV	590	372	17
1	SV	547.5	418.5	14.5
1	SV	447	493	18
1	SV	485.5	477.5	15.5
1	SV	521	481	16
1	SV	560	473	16
1	SV	574.5	445.5	15.5
1	SV	628.5	429.5	15.5
1	SV	595.5	430.5	11.5
1	SV	633.5	393.5	15.5
1	SV	678	390	14
1	SV	687	430	14
1	SV	665.5	454.5	12.5
1	SV	635	463	12
1	SV	608	479	12
1	SV	538.5	508.5	13.5
1	SV	492.5	509.5	13.5
1	SV	465	527	12
1	SV	517	524	12
1	SV	521.5	559.5	14.5
1	SV	546.5	537.5	13.5
1	SV	582	537	14
1	SV	630.5	511.5	15.5
1	SV	667.5	519.5	14.5
1	SV	715	504	14
1	SV	728.5	470.5	12.5
1	SV	751.5	496.5	12.5
1	SV	755.5	465.5	13.5
1	SV	760	432	14
1	SV	783.5	482.5	14.5
1	SV	692	542	13
1	SV	733	525	14
1	SV	634.5	556.5	14.5
1	SV	679	571	13
1	SV	621.5	586.5	12.5
1	SV	600.5	563.5	13.5
1	SV	581.5	616.5	13.5
1	SV	544.5	604.5	13.5
1	SV	657.5	488.5	14.5
1	SV	507.5	422.5	13.5
7	Plasma_membrane	1400.047	182,183,183,185,185,186,187,188,189,190,191,192,193,194,196,197,199,200,202,203,205,207,209,211,213,217,219,221,223,225,227,229,231,234,236,238,240,242,243,244,246,247,248,249,250,251,252,253,254,255,256,257,258,259,260,261,262,263,264,266,267,268,269,270,272,273,274,275,276,277,279,280,281,282,283,285,286,287,288,290,291,292,294,295,296,298,299,301,302,304,306,308,309,311,313,315,317,319,321,323…	935,934,933,931,930,929,927,926,924,922,920,918,916,914,912,909,907,904,901,897,894,890,886,883,879,872,868,865,861,858,855,851,848,845,842,838,835,832,830,827,824,822,820,818,816,813,811,809,807,805,803,802,800,798,796,794,792,789,787,785,782,780,778,776,773,771,768,766,763,761,758,755,753,750,747,744,741,738,735,733,730,727,724,721,718,715,712,709,706,702,699,696,692,689,686,683,679,675,671,667…
7	Active_zone	191.9624	448,448,448,449,449,450,450,451,451,452,452,453,453,454,455,456,457,458,458,459,460,461,462,463,464,465,466,466,467,468,468,469,470,470,471,472,473,473,474,475,476,477,477,478,479,479,480,481,481,482,482,483,484,485,485,486,487,488,488,489,490,491,492,493,494,495,496,497,498,500,501,502,503,504,506,507,508,509,511,512,513,514,515,516,517,518,519,520,521,522,523,523,524,525,526,527,528,528,529,530…	407,406,405,405,404,404,403,402,401,401,400,399,398,397,396,395,394,393,392,390,389,388,387,386,385,384,383,382,382,381,380,380,379,378,377,376,376,375,374,373,372,371,370,370,369,368,367,366,365,365,364,363,362,361,360,359,359,358,357,356,355,354,353,352,351,350,349,348,347,346,345,344,343,342,341,341,340,339,338,337,336,335,335,334,333,333,332,332,331,330,330,329,329,328,328,327,327,326,326,326…
1	SV	792.3333	429.3333	13.8002
1	LV	746.6667	376	29
