# Supplementary material for: SynapsEM: Computer-Assisted Synapse Morphometry
Source: Front Synaptic Neurosci. 2020 Dec 18;12:584549. doi: 10.3389/fnsyn.2020.584549 (PMC7775558; doi:10.3389/fnsyn.2020.584549)
Supplement: Supplementary file 6 [file Data_Sheet_4.ZIP › hippocampus_synaptic_profiles/090.txt]

1	docked_SV	1015	744	12
1	docked_SV	999	717	14
1	docked_SV	1026	797	14
1	tethered_SV	1003.5	829.5	12.5
1	tethered_SV	943.5	643.5	12.5
1	SV	961	767	13
1	SV	927.5	791.5	14.5
1	SV	902.5	821.5	12.5
1	SV	886	905	15
1	SV	868	944	14
1	tethered_SV	888.5	976.5	11.5
1	SV	835	874	14
1	SV	853.5	844.5	12.5
1	SV	835	828	13
1	SV	835.5	795.5	14.5
1	SV	855.5	732.5	11.5
1	SV	760	784	13
1	SV	780	757	14
1	SV	785.5	806.5	13.5
1	SV	826.5	750.5	11.5
1	SV	831.5	718.5	11.5
1	SV	775	865	14
1	SV	748.5	891.5	14.5
1	SV	709	899	14
1	SV	756.5	947.5	12.5
1	SV	773.5	920.5	13.5
1	SV	799	926	12
1	SV	791.5	889.5	13.5
1	SV	827	947	14
1	SV	695.5	952.5	13.5
1	SV	680.5	850.5	12.5
1	SV	715	761	12
1	SV	734	738	14
1	SV	768.5	705.5	12.5
1	SV	777	630	15
1	SV	700	634	15
1	SV	666	713	12
1	SV	702	710	13
1	SV	776	681	13
1	SV	710.5	670.5	10.5
1	SV	675.5	683.5	13.5
1	SV	639.5	662.5	13.5
1	SV	646.5	634.5	12.5
1	SV	613	641	13
1	SV	572.5	664.5	14.5
1	SV	589	682	11
1	SV	618.5	681.5	13.5
1	SV	591.5	721.5	13.5
1	SV	632.5	713.5	13.5
1	SV	645.5	744.5	13.5
1	SV	647.5	775.5	12.5
1	SV	575	818	14
1	SV	553.5	740.5	12.5
1	SV	515	747	12
1	SV	522	717	12
1	SV	490	695	11
1	SV	548	686	13
1	SV	553	632	13
1	SV	599	563	14
1	SV	669	560	12
1	SV	699	523	15
1	SV	586	597	13
1	SV	527.5	629.5	11.5
1	SV	490	651	14
1	SV	449.5	664.5	13.5
1	SV	412	686	12
1	SV	380.5	691.5	13.5
1	SV	426.5	641.5	13.5
1	SV	482	615	14
1	SV	452	573	14
1	SV	418	603	13
1	SV	515	571	14
1	SV	575	545	13
1	DCV	318	577	24
7	Plasma_membrane	1400.1435	730,729,730,730,731,731,731,732,733,734,735,735,736,736,737,737,738,739,740,740,741,742,743,743,744,745,746,748,749,750,751,753,754,756,757,759,762,765,766,768,770,771,774,776,779,781,783,785,787,789,791,794,798,799,801,803,806,809,813,816,820,822,824,826,830,832,835,837,838,842,846,849,853,855,857,860,862,864,868,870,872,874,876,877,879,881,882,887,890,895,901,907,910,913,914,916,917,920,925,926…	442,440,441,442,443,444,445,446,447,448,449,450,450,451,452,453,454,455,456,457,458,458,459,460,461,462,464,465,466,467,469,470,472,473,474,476,478,481,482,483,485,486,489,490,492,494,495,496,497,498,499,501,503,505,506,507,510,513,515,518,521,523,524,526,529,530,532,533,535,538,541,544,547,549,550,551,553,554,556,557,558,559,560,561,562,563,564,567,568,571,575,580,582,585,586,587,588,591,595,596…
7	Active_zone	248.1344	1042,1042,1042,1042,1042,1042,1042,1042,1042,1043,1043,1043,1043,1043,1043,1042,1042,1042,1042,1042,1042,1042,1042,1042,1042,1042,1042,1042,1042,1041,1041,1041,1041,1041,1041,1041,1041,1040,1040,1040,1040,1040,1040,1040,1040,1039,1039,1039,1039,1038,1038,1038,1037,1037,1037,1036,1036,1035,1035,1035,1034,1034,1034,1033,1033,1033,1032,1032,1032,1031,1031,1031,1030,1030,1030,1029,1028,1028,1028,1027…	836,834,833,832,831,830,829,828,827,826,825,824,823,822,821,820,819,818,817,816,815,814,813,812,810,809,808,806,805,804,803,802,801,800,799,798,797,796,795,794,793,792,791,790,789,789,788,787,786,785,784,783,781,780,779,778,777,776,775,774,772,771,770,769,767,766,765,764,763,762,761,760,759,758,757,755,754,753,752,752,751,750,749,745,743,741,740,739,738,737,735,732,729,727,726,724,723,721,720,719…
